# Supplementary material for: ORR viability of alumina-supported platinum nanocluster: exploring oxidation behaviour by DFT
Source: Royal Society of Chemistry journal article supplement (doi:10.1039/c7cp04029f), 2017-01-01
Supplement: c7cp04029f1.pdf [file c7cp04029f1.pdf]

## ORR viability of alumina supported platinum nanocluster: Exploring the oxidation behaviour by DFT methods

Sandeep Nigam and Chiranjib Majumder

Chemistry Division Bhabha Atomic Research Centre, Trombay, Mumbai 400 085

### Supporting Information

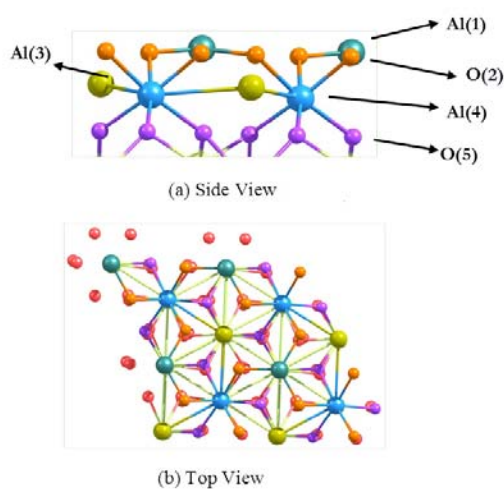

Figure-S1: Side and top view of  $\alpha$ - $\text{Al}_2\text{O}_3(0001)$  surface

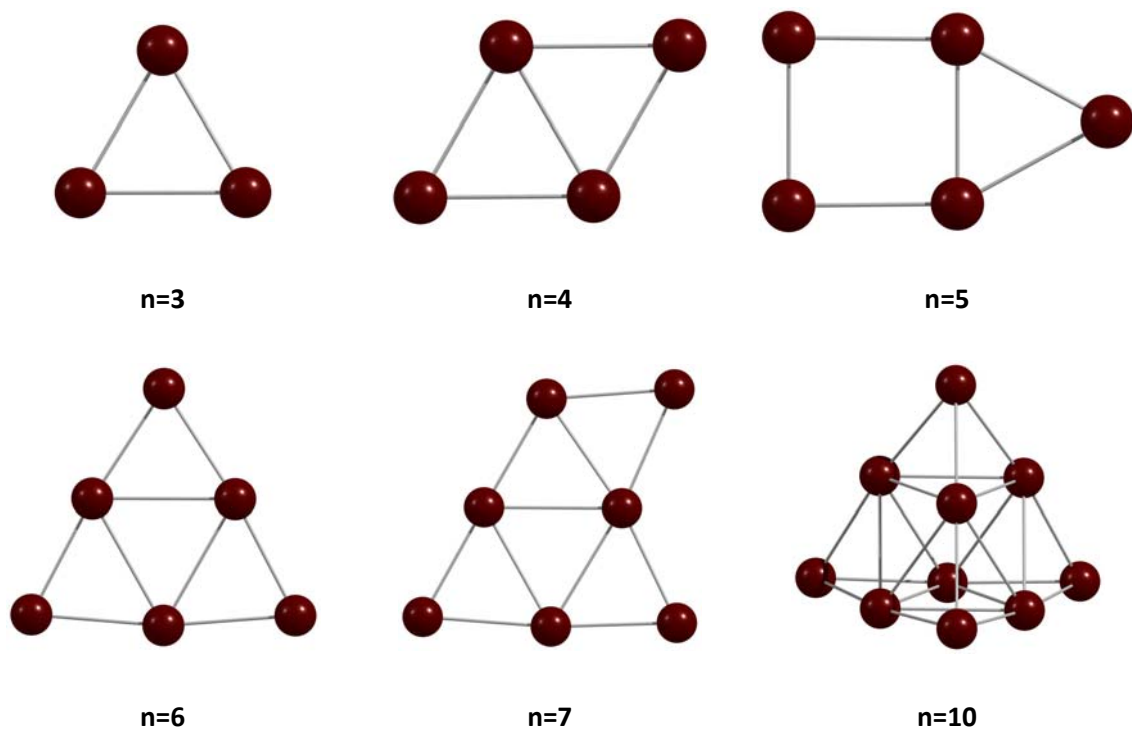

Figure-S2: Ground state structure of Pt<sub>n</sub> clusters in the gas phase.

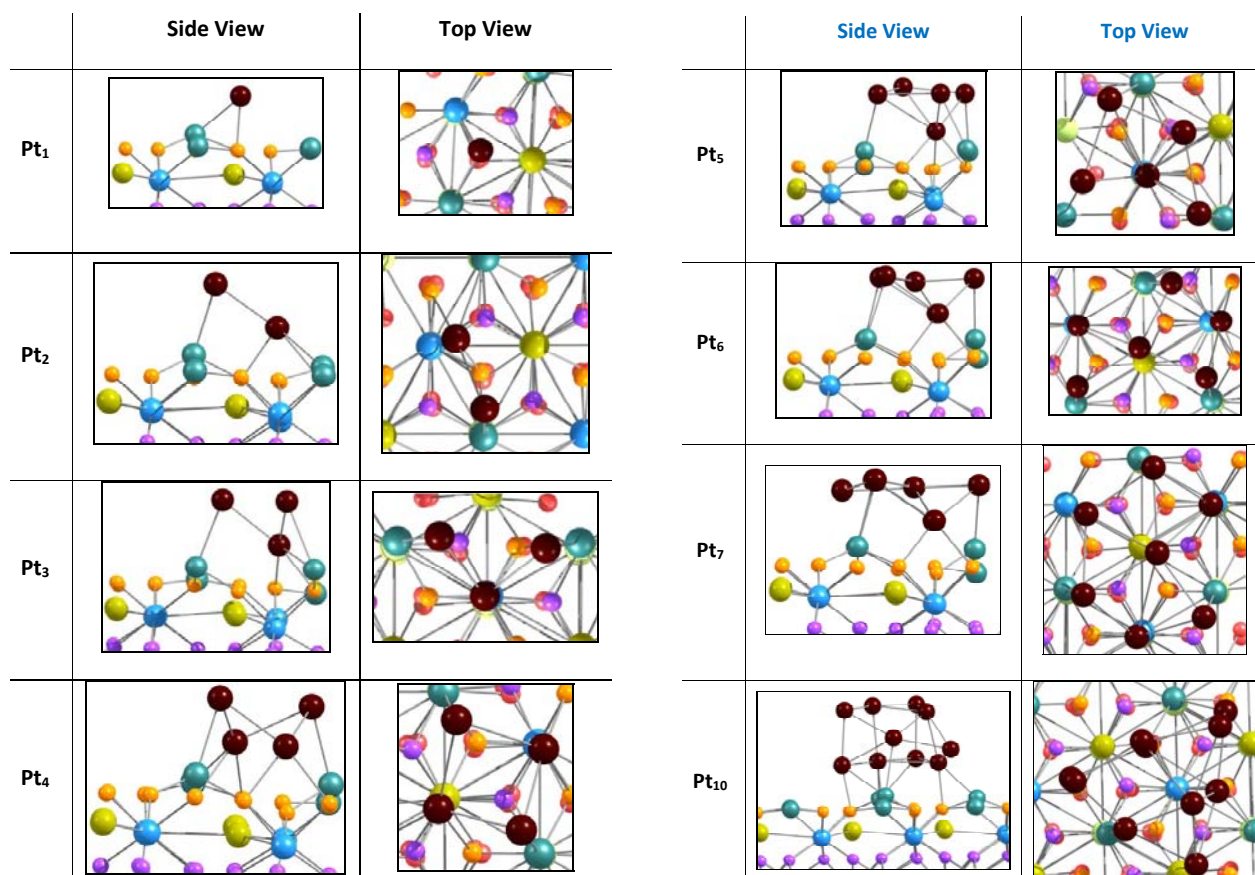

Figure-S3: Side and top view of ground state structure of alumina supported Pt<sub>n</sub> clusters.

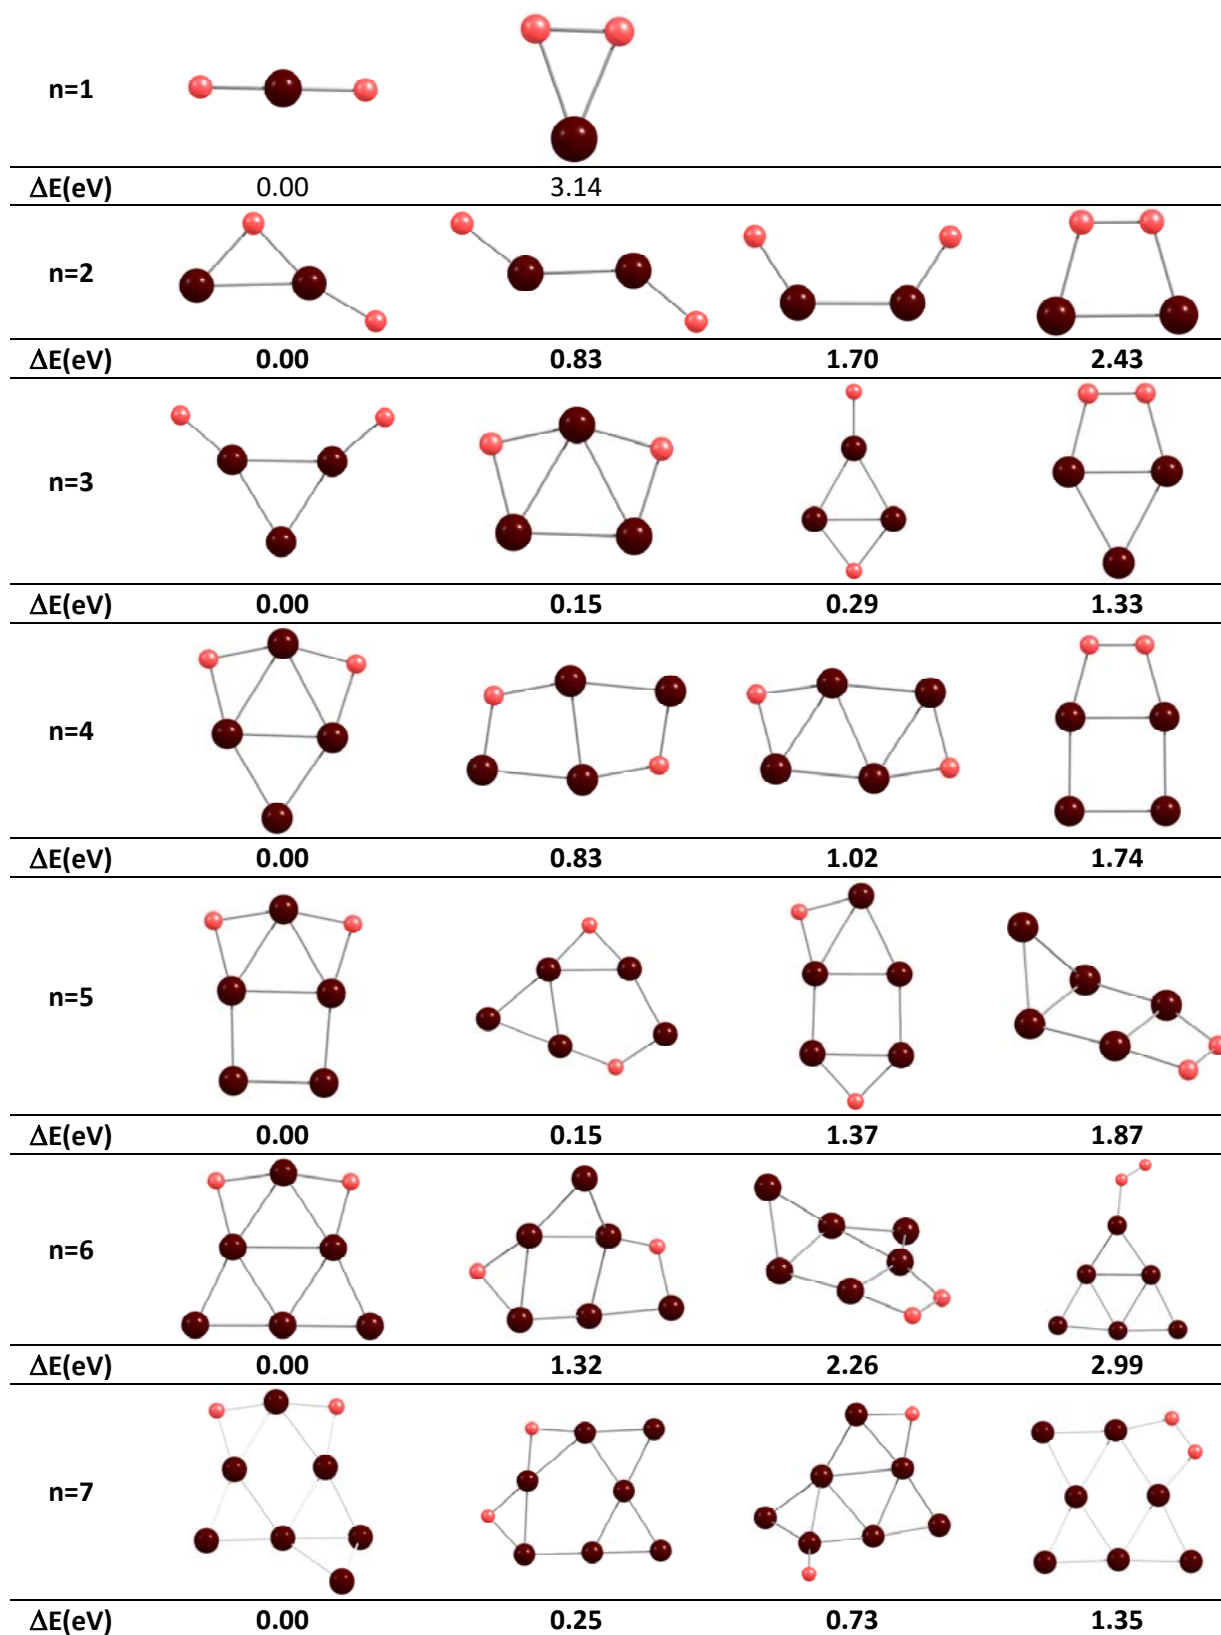

Figure S4: Low lying isomers of  $\text{Pt}_n\text{@O}_2$ . Relative stability ( $\Delta E$ -eV) is also presented.

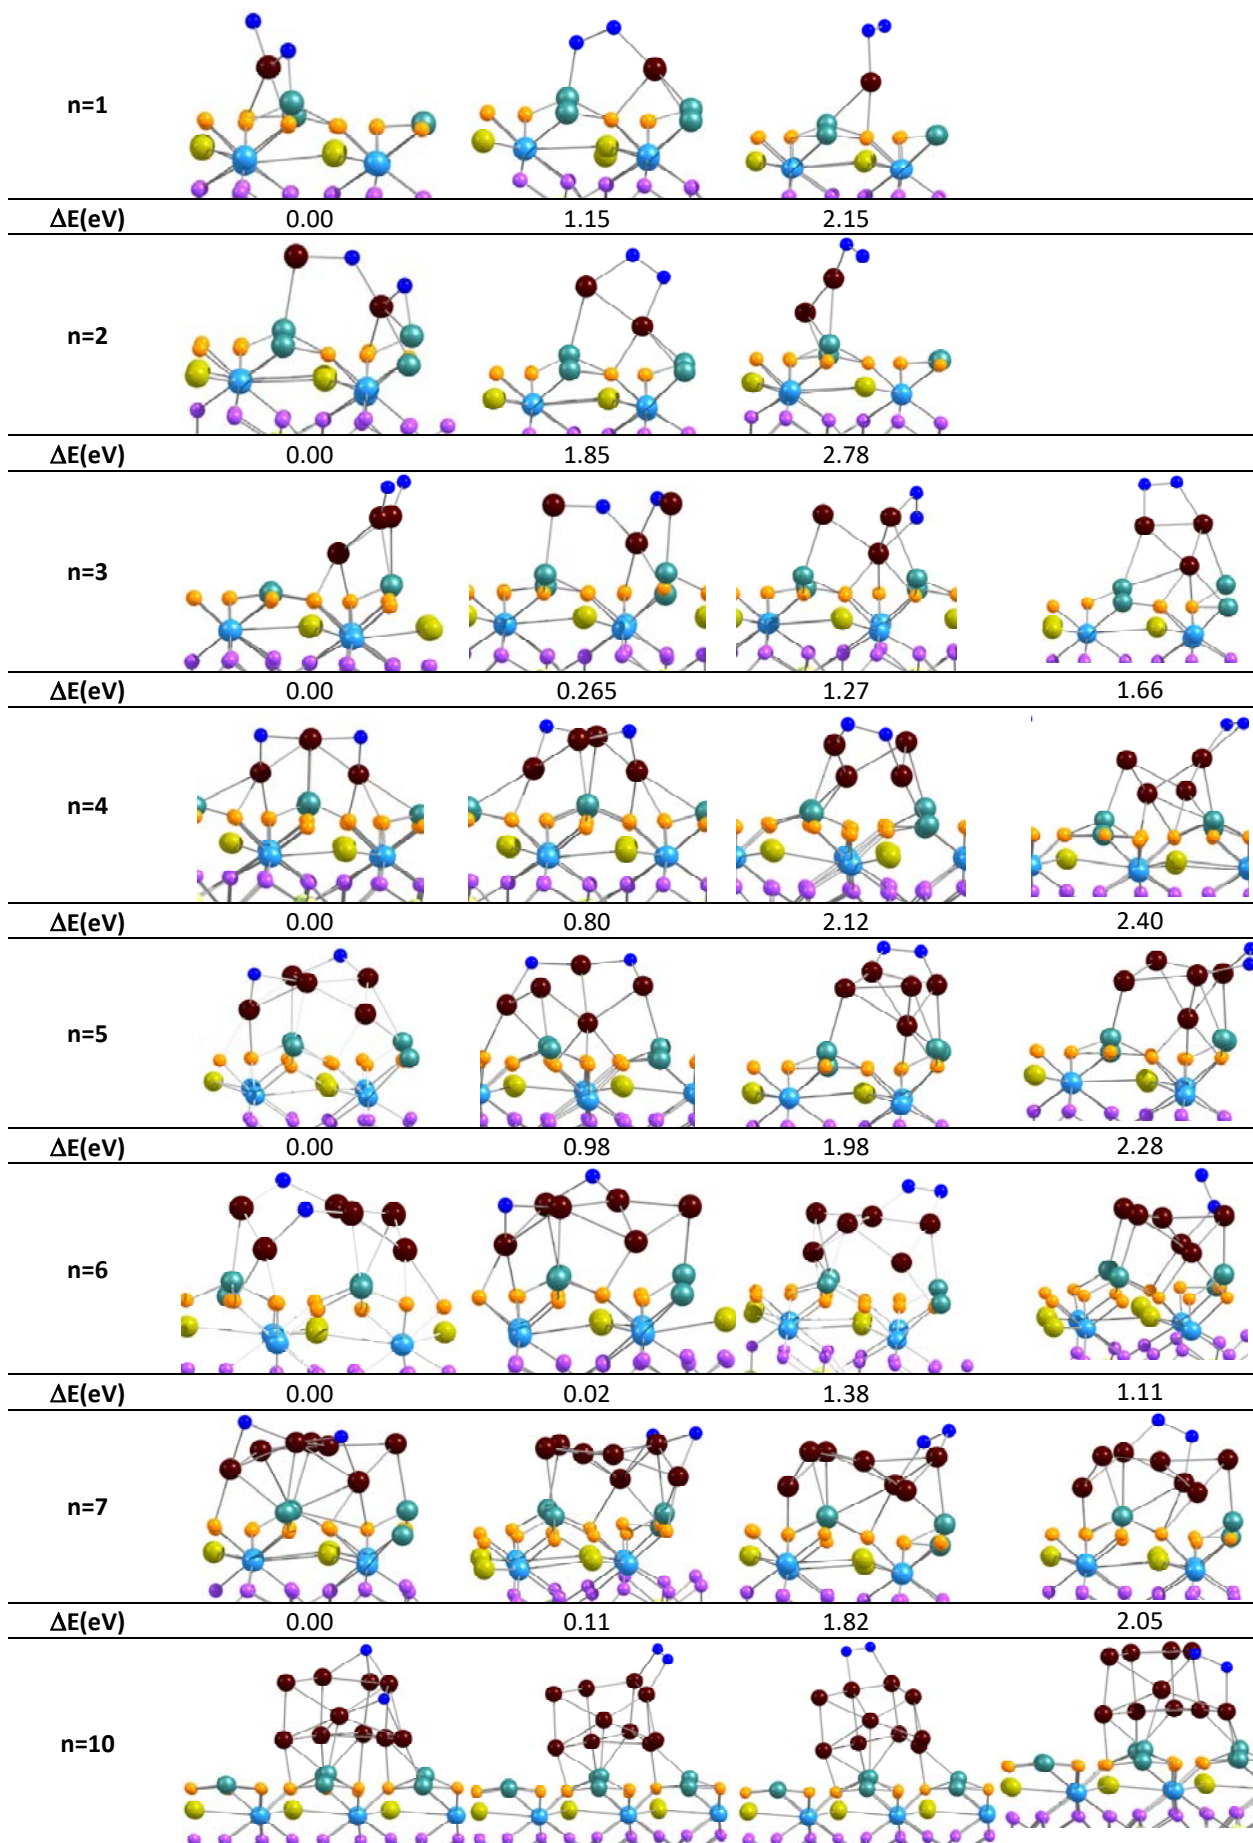

Figure S5: Low lying isomers of alumina supported- $\text{Pt}_n@O_2$ . Relative stability ( $\Delta E$ -eV) is also presented.

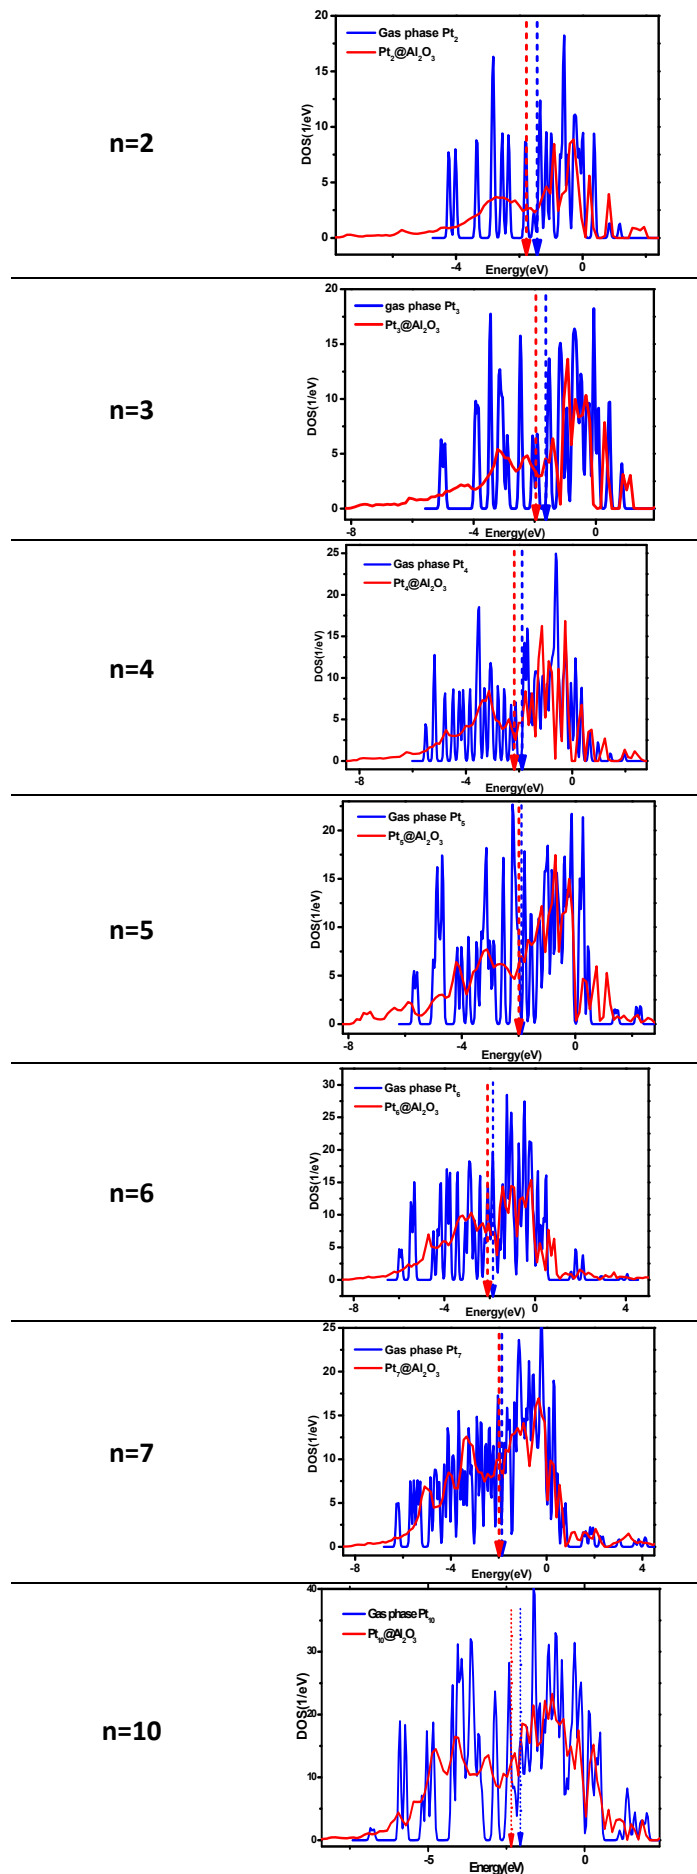

Figure-S6: Platinum-d orbital partial dos for free and  $Al_2O_3$  supported  $Pt_n$  cluster. Arrows denote positions of corresponding d-band centers.

**Table-S1: O-O Bond lengths (Å) in oxygen molecularly adsorbed on Pt<sub>n</sub> cluster ( Pt<sub>n</sub> + O<sub>2</sub> → Pt<sub>n</sub>O<sub>2</sub>)**

| n  | Pt <sub>n</sub> | Pt <sub>n</sub> @Al <sub>2</sub> O <sub>3</sub> |
|----|-----------------|-------------------------------------------------|
| 1  | 1.41            | 1.40                                            |
| 2  | 1.41            | 1.40                                            |
| 3  | 1.42            | 1.43                                            |
| 4  | 1.42            | 1.42                                            |
| 5  | 1.44            | 1.43                                            |
| 6  | 1.43            | 1.43                                            |
| 7  | 1.40            | 1.42                                            |
| 10 | 1.44            | 1.45                                            |

Note: O-O bond length in oxygen molecularly adsorbed on Pt(111) surface [Pt(111)O<sub>2</sub>] is 1.43 Å

**Table-S2: Pt-O Bond lengths (Å) of in oxides of Pt<sub>n</sub> cluster ( Pt<sub>n</sub> + O<sub>2</sub> → O-Pt<sub>n</sub>-O)**

| Cluster Size(n) | O-Pt <sub>n</sub> -O | O-supported Pt <sub>n</sub> -O | Relative (%) elongation for supported cluster |
|-----------------|----------------------|--------------------------------|-----------------------------------------------|
| 1               | 1.73 Å               | 1.87 Å                         | 8.09 %                                        |
| 2               | 1.80 Å               | 1.92 Å                         | 6.67%                                         |
| 3               | 1.84 Å               | 1.89 Å                         | 2.72%                                         |
| 4               | 1.90 Å               | 1.96 Å                         | 3.16%                                         |
| 5               | 1.90 Å               | 1.96 Å                         | 3.16%                                         |
| 6               | 1.90 Å               | 1.97 Å                         | 3.68%                                         |
| 7               | 1.90 Å               | 1.98 Å                         | 4.21%                                         |
| 10              | 1.91 Å               | 2.07 Å                         | 8.38%                                         |

Note: Pt-O bond length in oxide of Pt(111) surface [O-Pt(111)-O] is 2.09 Å

**Table-S3: Bader charge on platinum atom of supported Platinum cluster (Pt<sub>n</sub>@Al<sub>2</sub>O<sub>3</sub>) before and after oxidation.**

| Cluster Size(n) | Charge on Pt in Pt <sub>n</sub> @Al <sub>2</sub> O <sub>3</sub> | Charge on Pt in [O-(Pt <sub>n</sub> @Al <sub>2</sub> O <sub>3</sub> )-O] |
|-----------------|-----------------------------------------------------------------|--------------------------------------------------------------------------|
| 1               | -0.37e                                                          | 1.32e                                                                    |
| 2               | -0.56e                                                          | 1.12e                                                                    |
| 3               | -0.78e                                                          | 0.71e                                                                    |
| 4               | -0.90e                                                          | 0.75e                                                                    |
| 5               | -1.12e                                                          | 0.50e                                                                    |
| 6               | -1.20e                                                          | 0.51e                                                                    |
| 7               | -1.24e                                                          | 0.48e                                                                    |
| 10              | -1.15e                                                          | 0.33e                                                                    |

**Table-S4: Relaxation in z-coordinate of Pt<sub>n</sub>@Al<sub>2</sub>O<sub>3</sub> cluster after oxidation [ O- (Pt<sub>n</sub>@Al<sub>2</sub>O<sub>3</sub>)-O]. The relaxation has been calculated by taking the average of z-coordinate of supported cluster before and after oxidation. The negative sign in relaxation means reduction in z-coordinate, movement towards surface (reduction in distance between cluster and surface)**

| Cluster Size (n) | % Relaxation in z - coordination |
|------------------|----------------------------------|
| 2                | -1.75 %                          |
| 3                | -2.45%                           |
| 4                | -1.31%                           |
| 5                | -4.37%                           |
| 6                | -2.37%                           |
| 7                | -4.57%                           |
| 10               | -2.35%                           |
